# Supplementary material for: Revealing the origin of wildcat reappearance after presumed long-term absence
Source: Springer Nature journal article supplement (doi:10.1007/s10344-020-01433-7), 2020-10-29

Overlooked or recolonized? Revealing the origin of wildcat reappearance after presumed long-term absence

European Journal of Wildlife Resources

Sarah A. Mueller, Tobias E. Reiners, Annika Tiesmeyer, Katharina Steyer, Carsten Nowak

Senckenberg Research Institute, [smueller@senckenberg.de](mailto:smueller@senckenberg.de)

| Table S1. List of projects during the study period. Year, name, number of confirmed samples from roadkill (Tissue) and hairtraps (Hair), *n* individuals are indicated. For the hair samples, the *n* hairtraps, location and time frame are indicated when known. | | | | | | | | |
| --- | --- | --- | --- | --- | --- | --- | --- | --- |
| Year | Projects | Type of Activity | Tissue | Hair | Individuals | # hairtraps | location | time frame |
| 2004 | TLUG | Roadkill Assessment | 2 | 0 | 2 | 0 | na | na |
| 2005 | TLUG | Roadkill Assessment | 3 | 0 | 3 | 0 | na | na |
| 2006 | TLUG Franz Müller | Roadkill Assessment | 7 | 0 | 7 | 0 | na | na |
| 2007 | TLUG Franz Müller Auswilderung Spessart (AS) | Roadkill Assessment Hair trapping | 1 | 7 | 5 | 11 (AS) | Spessart | Jan.-April |
| 2008 | TLUG Franz Müller BUND Thuringia | Roadkill Assessment Hair trapping | 11 | 1 | 12 |  |  |  |
| 2009 | TLUG Franz Müller BUND Thuringia Rhön Natur e.v. (RN) | Roadkill Assessment Hair trapping | 25 | 8 | 25 | 504 (RN) | Rhön | year long |
| 2010 | TLUG Franz Müller BUND Thuringia Rhön Natur e.v. (RN) HLSV | Roadkill Assessment Hair trapping | 23 | 86 | 64 | 504 (RN) | Rhön, highway A44/A7 | year long |
| 2011 | TLUG Franz Müller BUND Wildkatzensprung (WKS) Rhoen Natur e.v. (RN) BUND Thuringia Hessen Forst FENA | Roadkill Assessment Hair trapping | 24 | 5 | 25 | 100 (WKS) 504 (RN) | Rhön, Spessart | year long |
| 2012 | TLUG Franz Müller BUND Wildkatzensprung (WKS) Rhön Natur e.v. (RN) Hessen Mobil Senckenberg project (SN) | Roadkill Assessment Hair trapping | 21 | 258 | 127 | 100 (WKS) 504(RN) ~50 (SN) | Spessart, Hainich | year long |
| 2013 | TLUG Franz Müller BUND Wildkatzensprung (WKS) Institut für Tierökologie und Naturbildung BUND Thuringia Biosphärenreservat Rhön (BRR) | Roadkill Assessment Hair trapping | 26 | 100 | 77 | 100(WKS) 161 (BRR) | Spessart, Hainich, Rhön | year long |
| 2014 | Franz Müller BUND Wildkatzensprung (WKS) Biosphärenreservat Rhön (BRR) Forstamt Schlüchtern | Roadkill Assessment Hair trapping | 3 | 152 | 89 | 150 (WKS) 162 (BRR) | Spessart, Hainich, Rhön | year long |
| 2015 | Franz Müller BUND Wildkatzensprung (WKS) Biosphärenreservat Rhön (BRR) Forstamt Schlüchtern | Roadkill Assessment Hair trapping | 3 | 100 | 120 | 150 (WKS) 135 (BRR) | Spessart, Hainich, Rhön | year long |
| 2016 | Franz Müller BUND Wildkatzensprung (WKS) Biosphärenreservat Rhön (BRR) Forstamt Schlüchtern | Roadkill Assessment Hair trapping | 3 | 56 | 50 | 150 (WKS) 60 (BRR) | Spessart, Hainich, Rhön | year long |
| 2017 | Franz Müller BUND Wildkatzensprung (WKS) | Roadkill Assessment Hair trapping | 3 | 30 | 12 | 50 (WKS) | Spessart | Jan.-Apr. |

**Fig. S1**. Additionally, lagged scores from the second PC axis are shown, however, this axis was not signficant (above). sPCA eigenvalues showing the signficant axes of the spatial analysis (below).

**a**

**b**


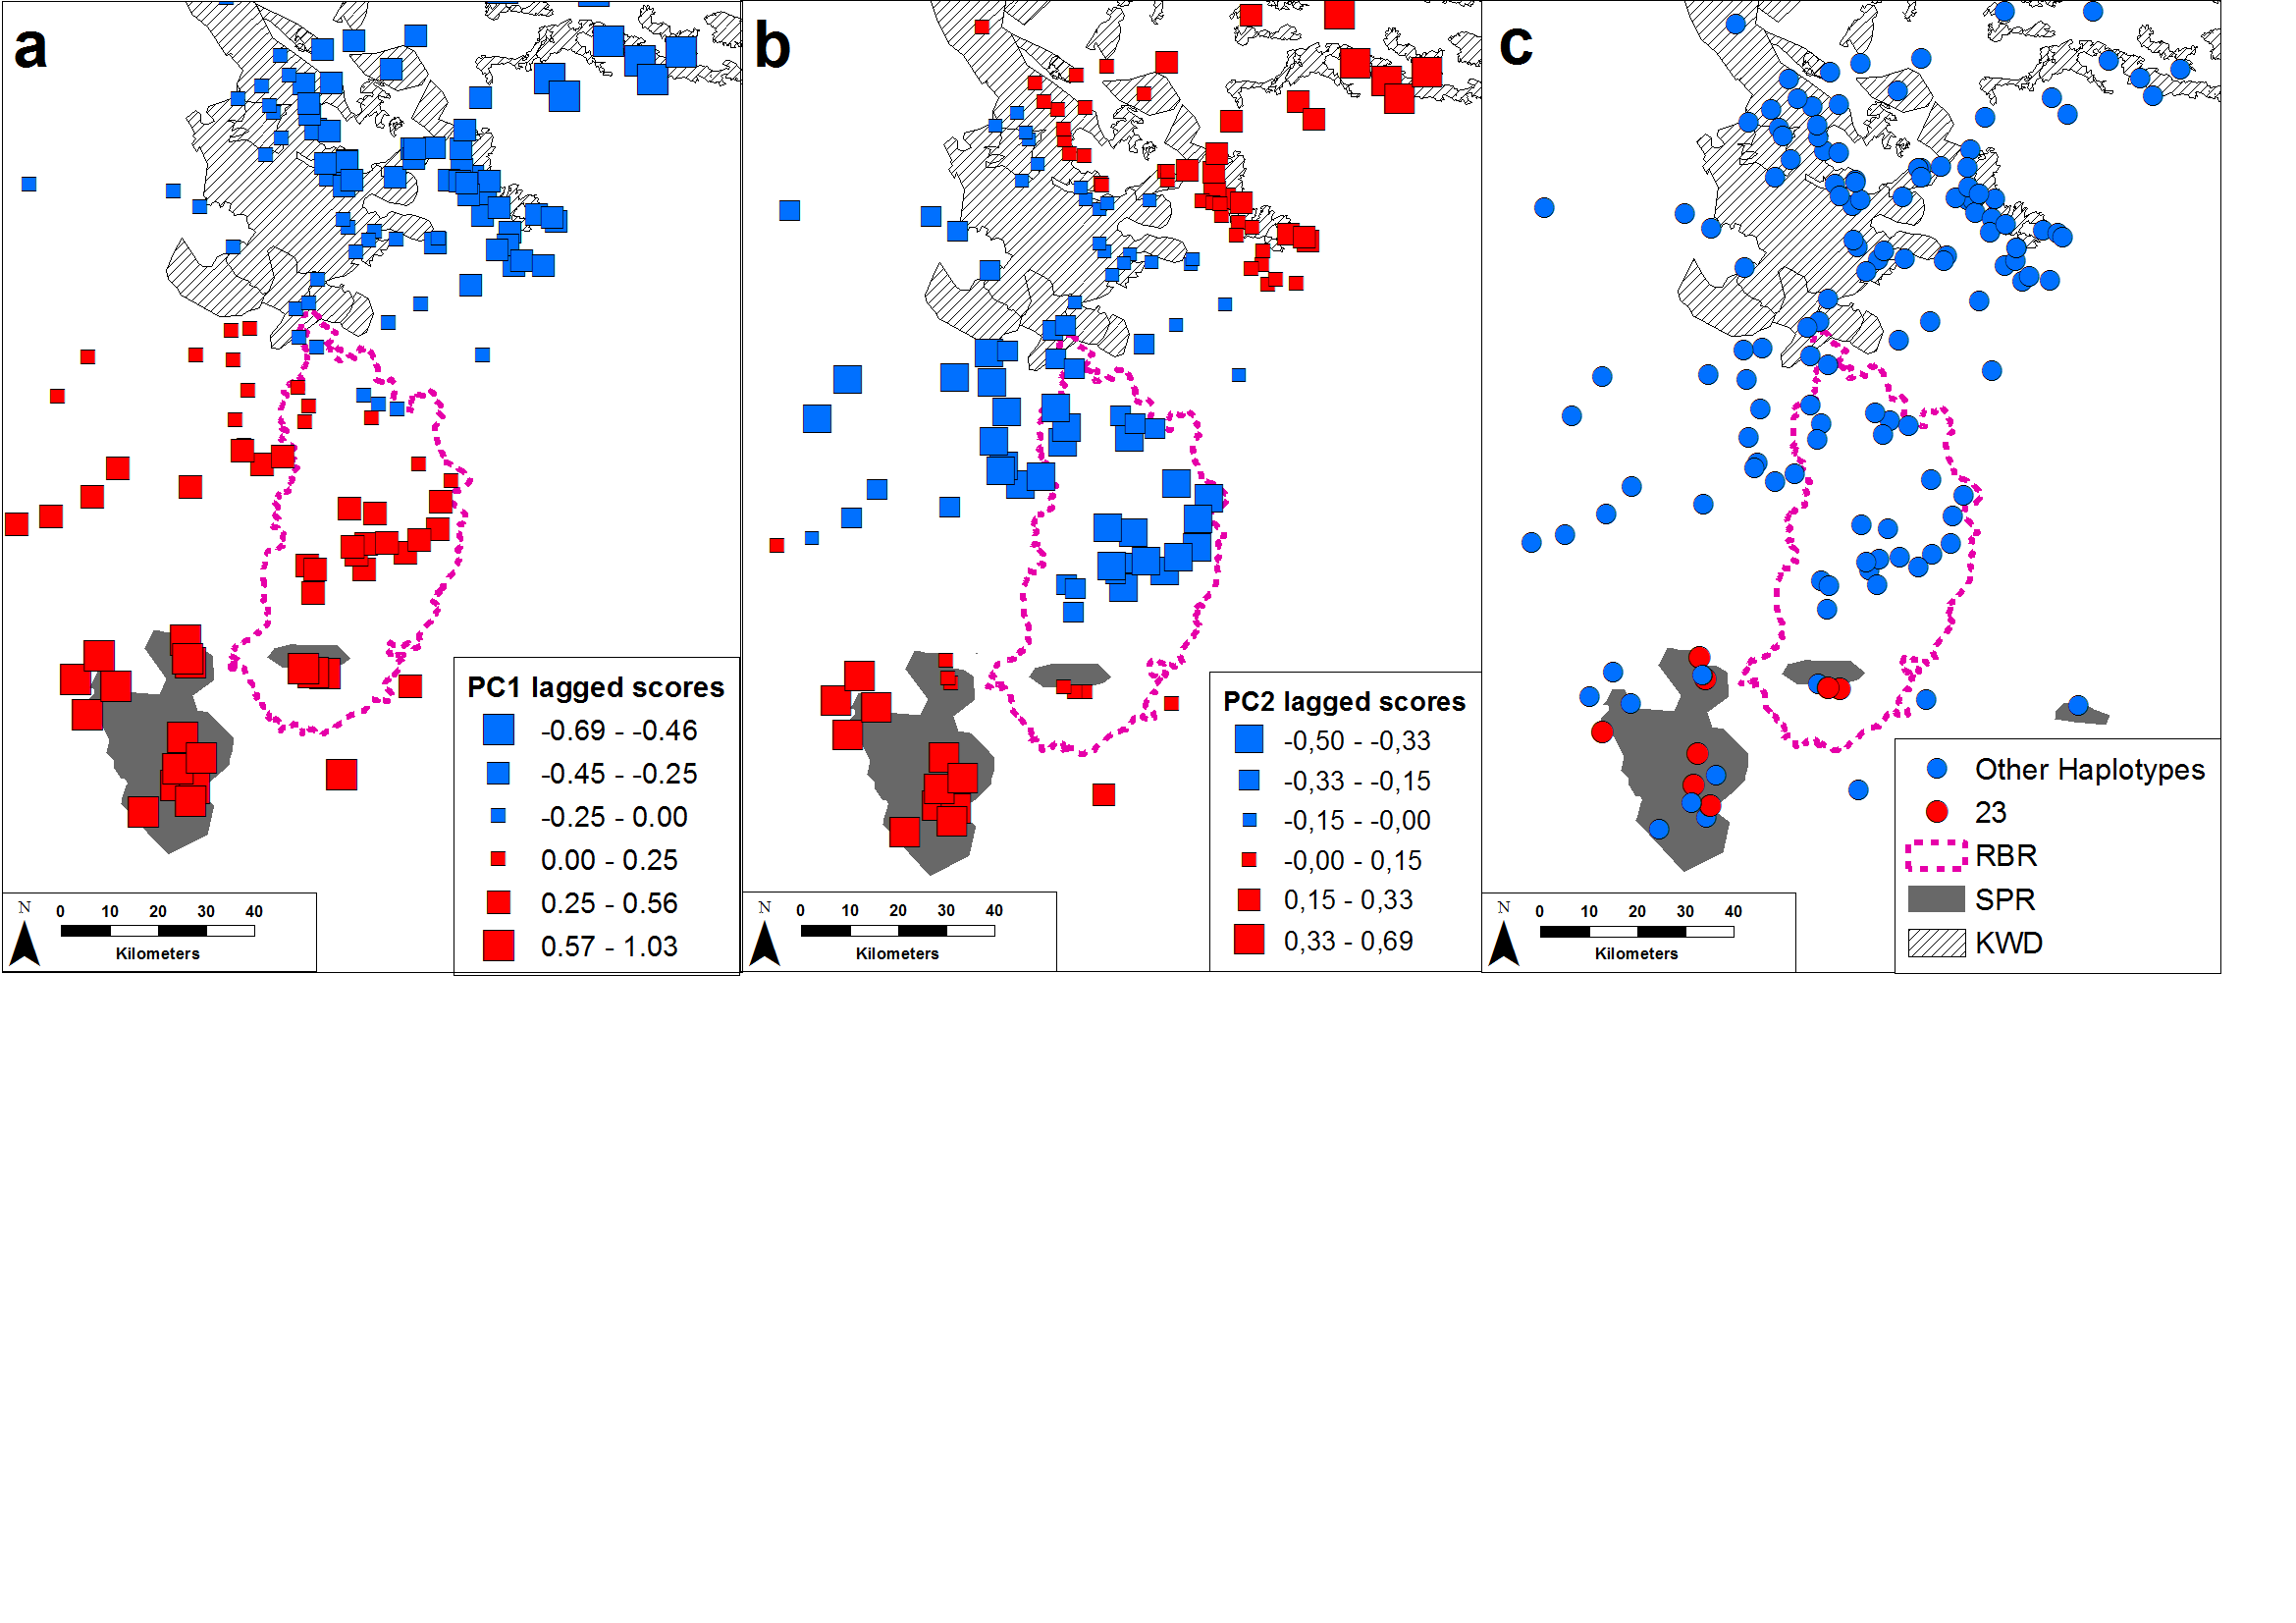


**Fig. S2** Map showing results from an extended dataset of 439 wildcat individuals using 14 microsatellite markers. Here we show the STRUCTURE results with three clusters, the spatial genetic structure as assessed by sPCA and haplotype map highlighting the reintroduced haplotype SNG-HP-FS23. (a) The most likely number of clusters, *K*3, indicated by STRUCTURE results. (b) Individual scores from the first principal component: large blue squares indicated highly positive scores; large red squares indicated highly negative scores. (c) Map of individuals within the study area with the haplotype SNG-HP-FS 23 (red) and all other haplotypes (blue).


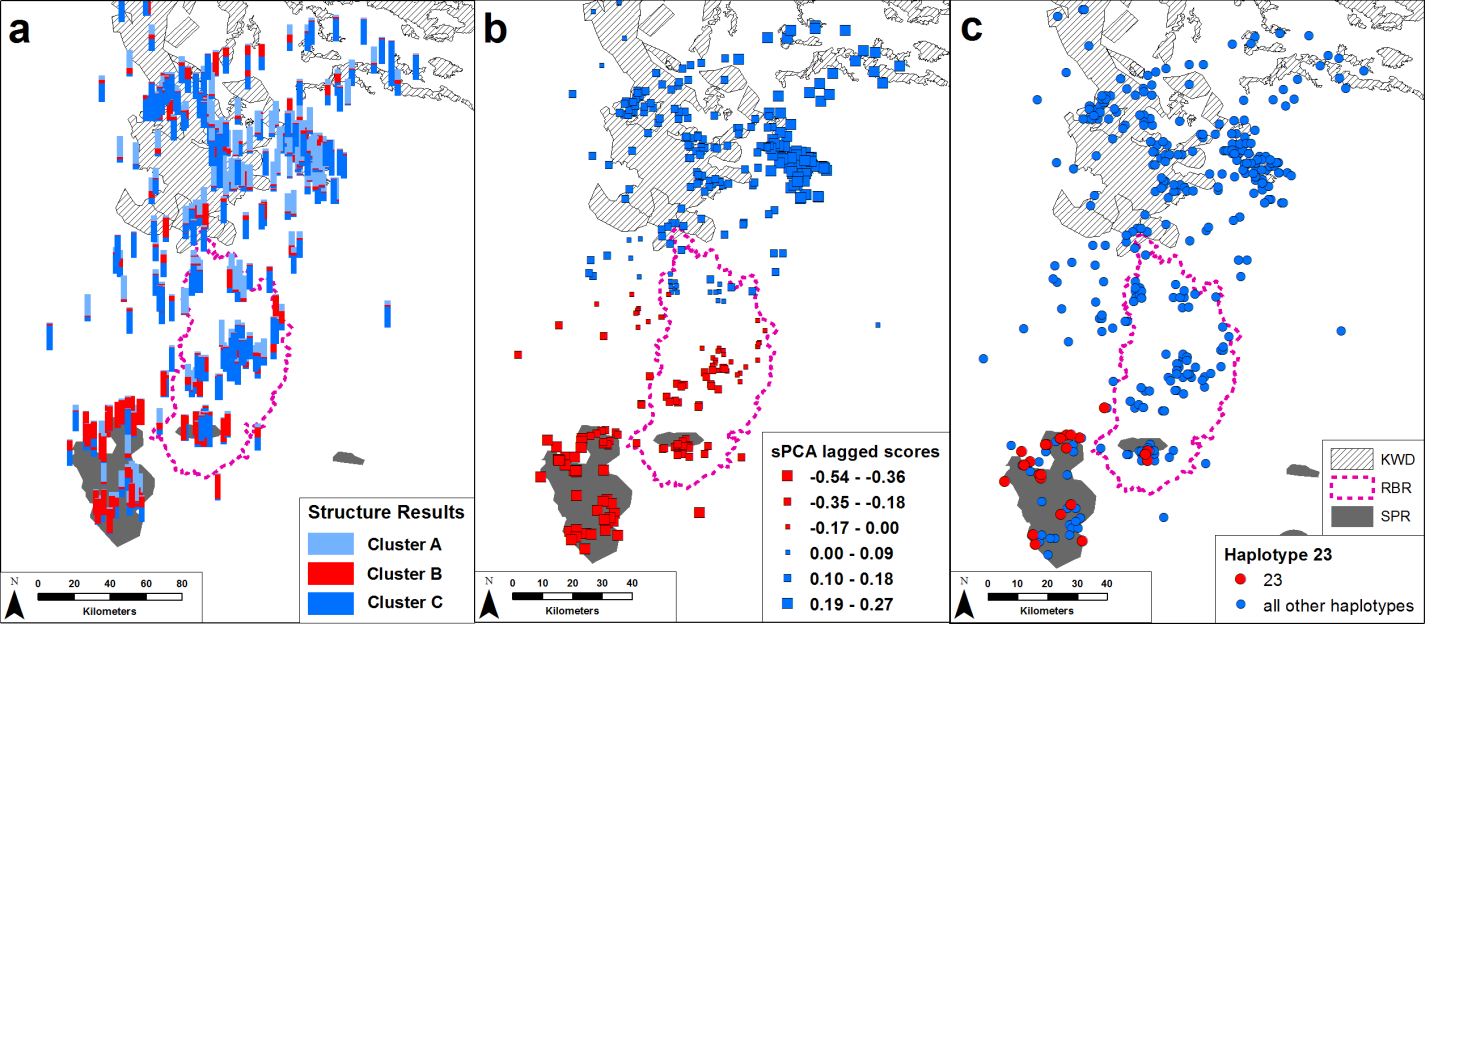

Supplement: MOESM1 [file 10344_2020_1433_MOESM1_ESM.docx]
